# Supplementary material for: COVID-19 Infection Deteriorates the Clinical Condition and Outcomes of Acute Pancreatitis: A Meta-Analysis
Source: Hindawi journal article supplement (doi:10.1155/2022/6823866), 2022-10-28

**A Renal failure**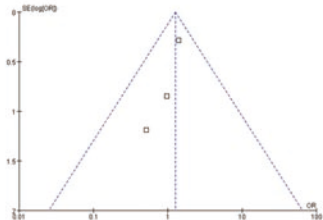**B Need for surgery**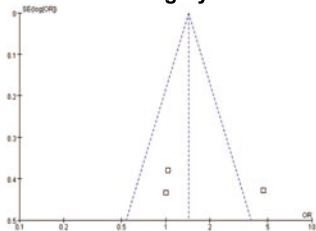**C Length of hospital stay**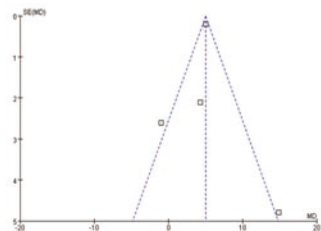**D Leucocyte**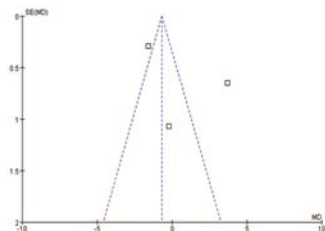**E Lactate dehydrogenase**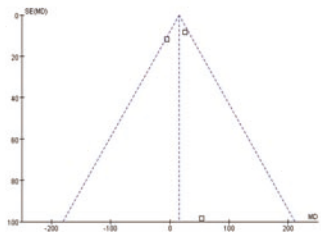**F Procalcitonin**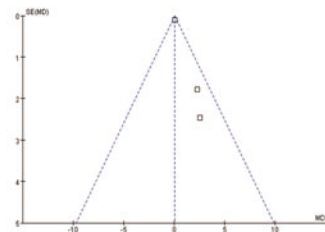

Supplement: f1 [file 6823866.f1.zip]
